# Supplementary material for: Probing the role of the residues in the active site of the transaminase from Thermobaculum terrenum
Source: PubMed Central journal article supplement (PMC8320979; doi:10.1371/journal.pone.0255098), 2021-07-29

The dependence of the observed rate constant of half-reaction ( $k_{obs}$ ) on concentration of ((*R*)-(+)-1-phenylethylamine (R-PEA) in 50 mM CHES buffer, pH 9.0, at 40 °C. All data are collected in triplicate, and error bars correspond to the standard deviation of the mean (some are too small to be seen).

For WT *TaTT*

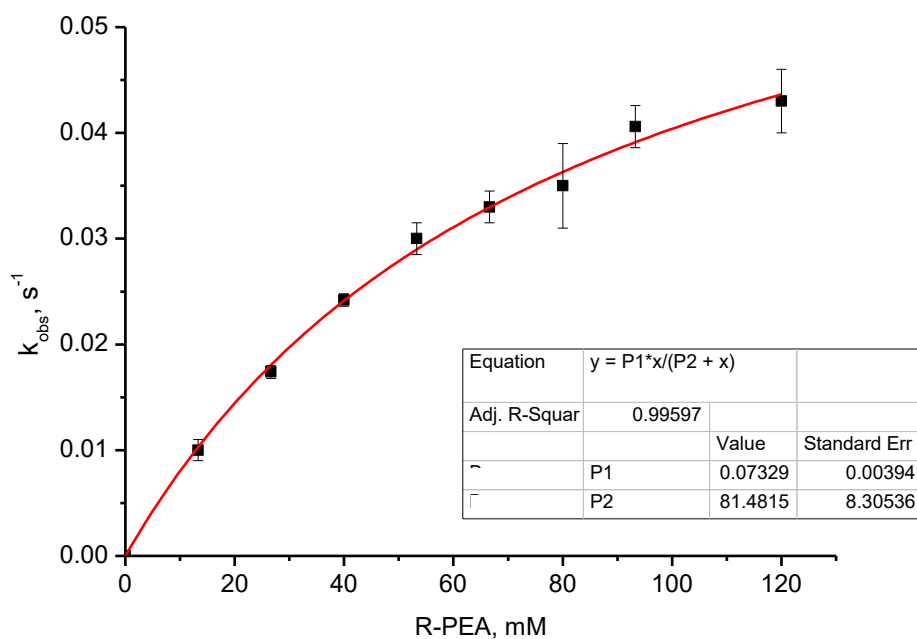

For mP2 variant

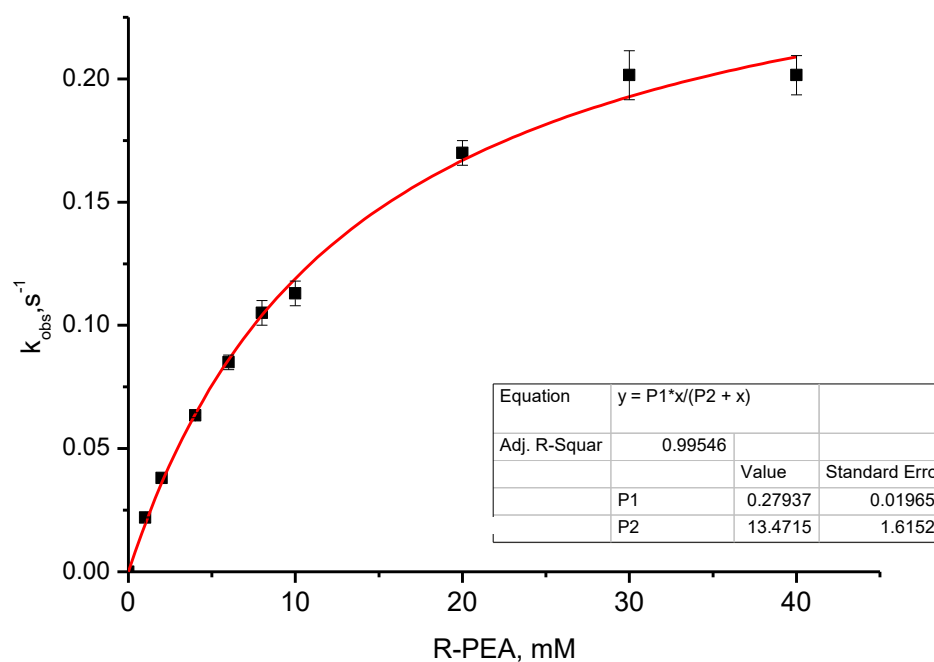

For **mP3** variant

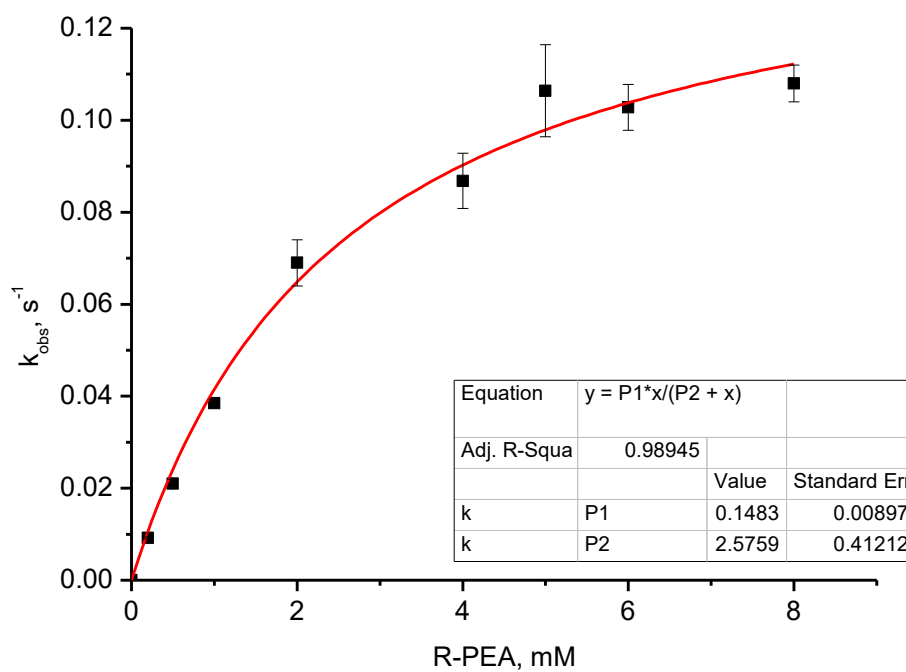

For **mP3O1** variant

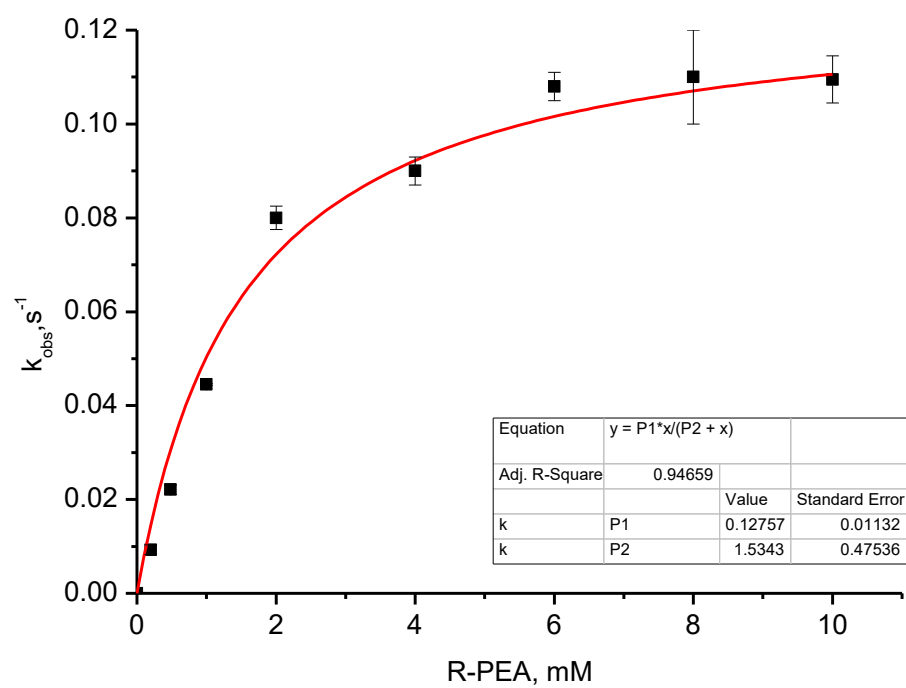

For **mO1**

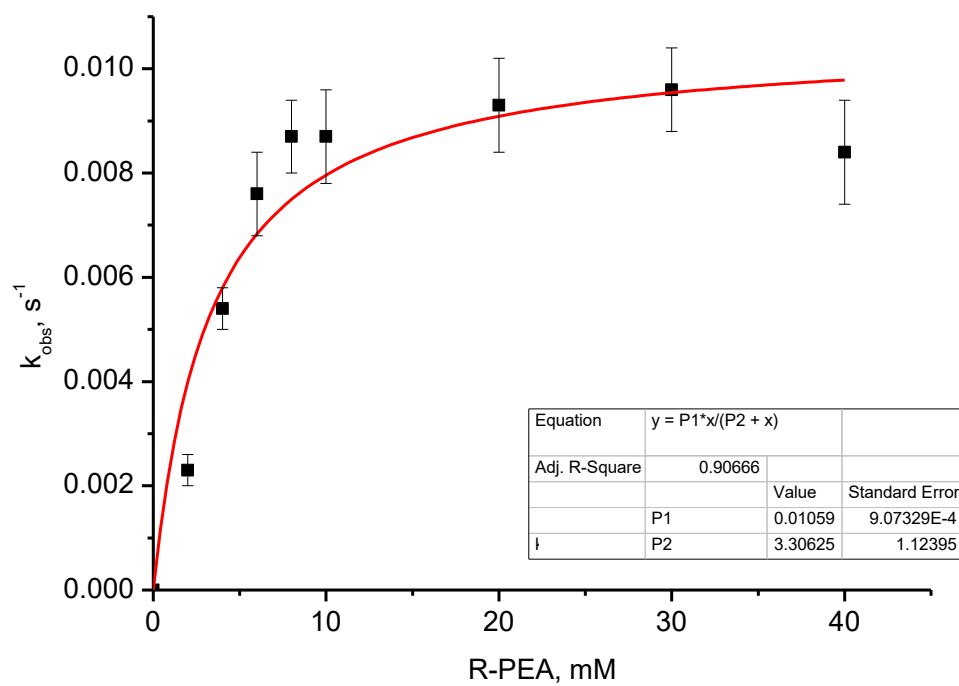

The dependence of the observed rate constant of half-reaction ( $k_{obs}$ ) on concentration of ((*R*)-(+)-1-phenylethylamine (R-PEA) in 50 Tris-HCl buffer, pH 8.0, at 30 °C

For WT *TaTT*

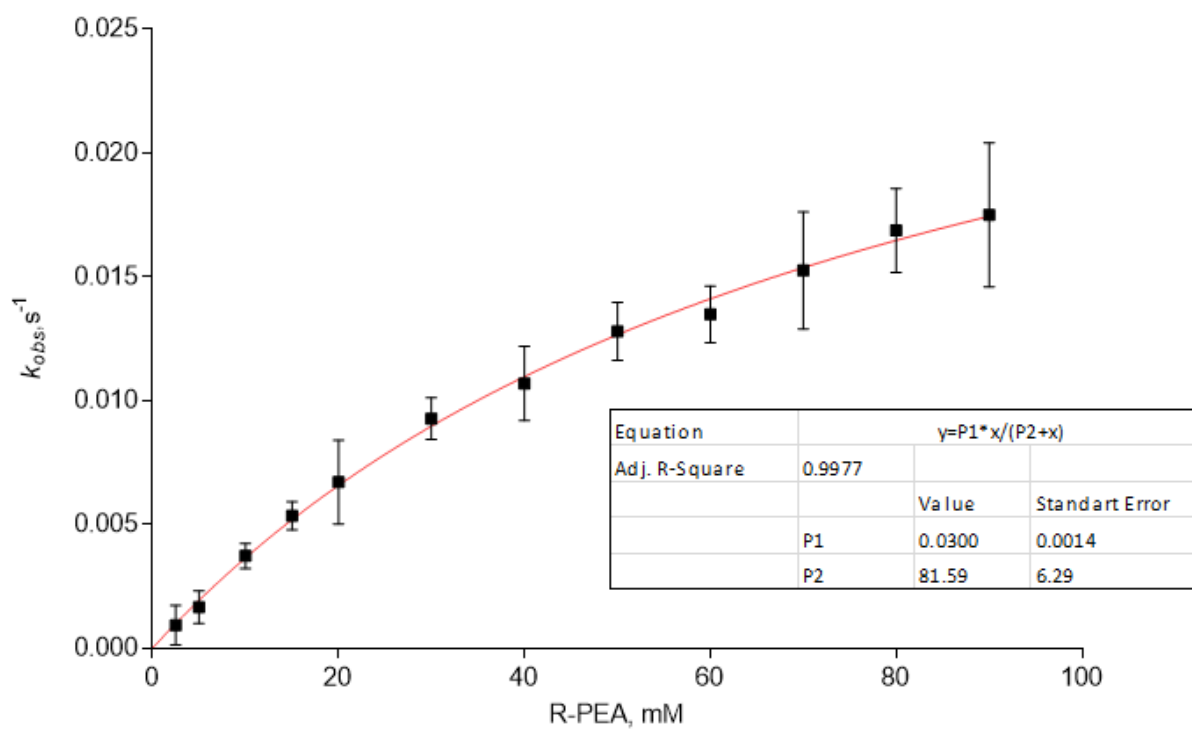

For mP1

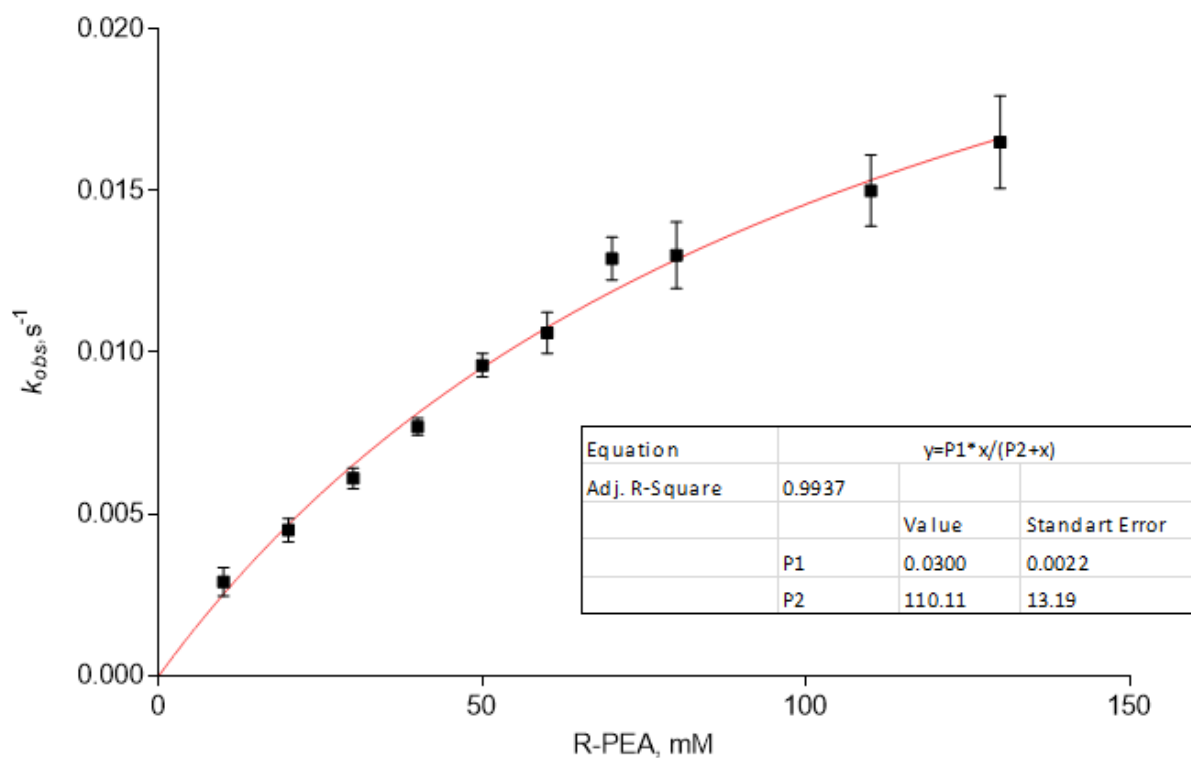

For mP2

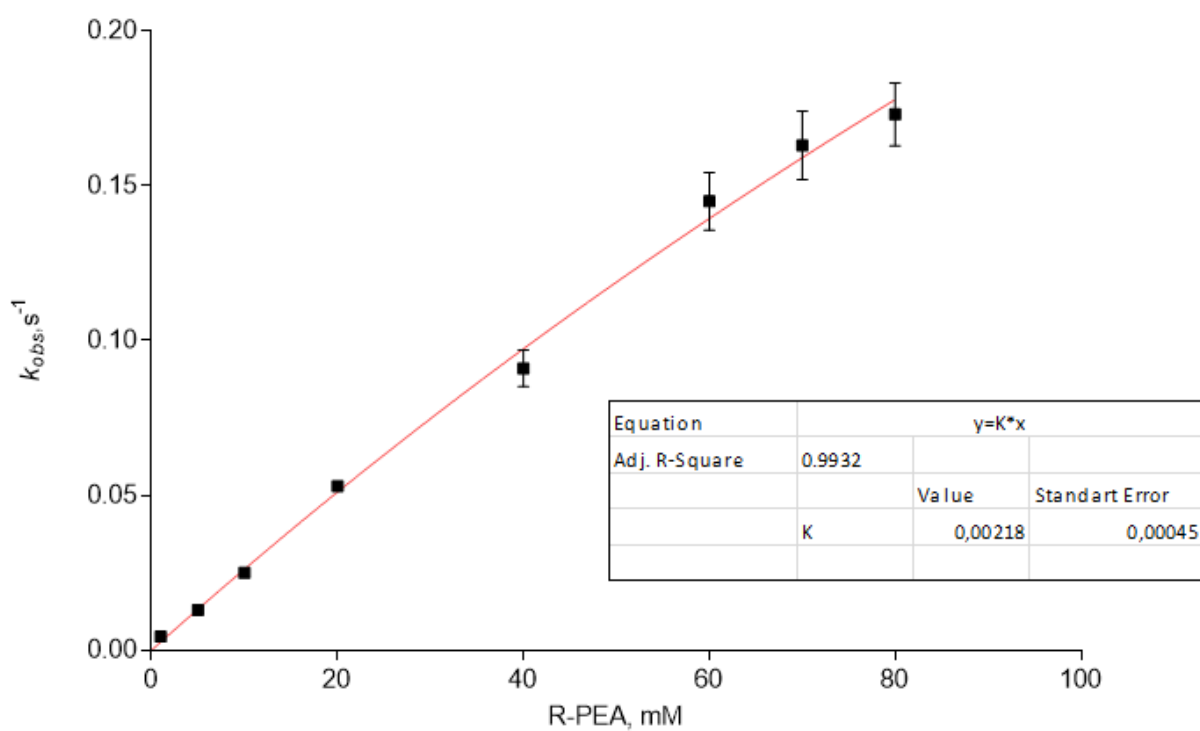

For **mP3**

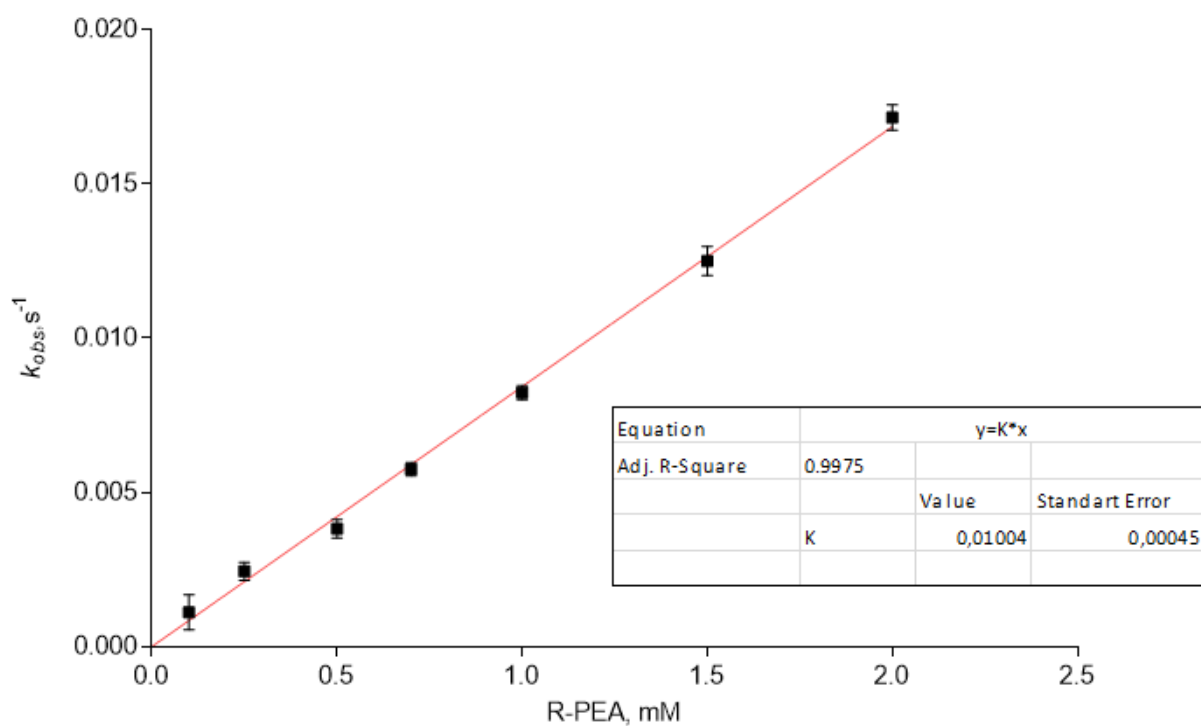

For **mO1**

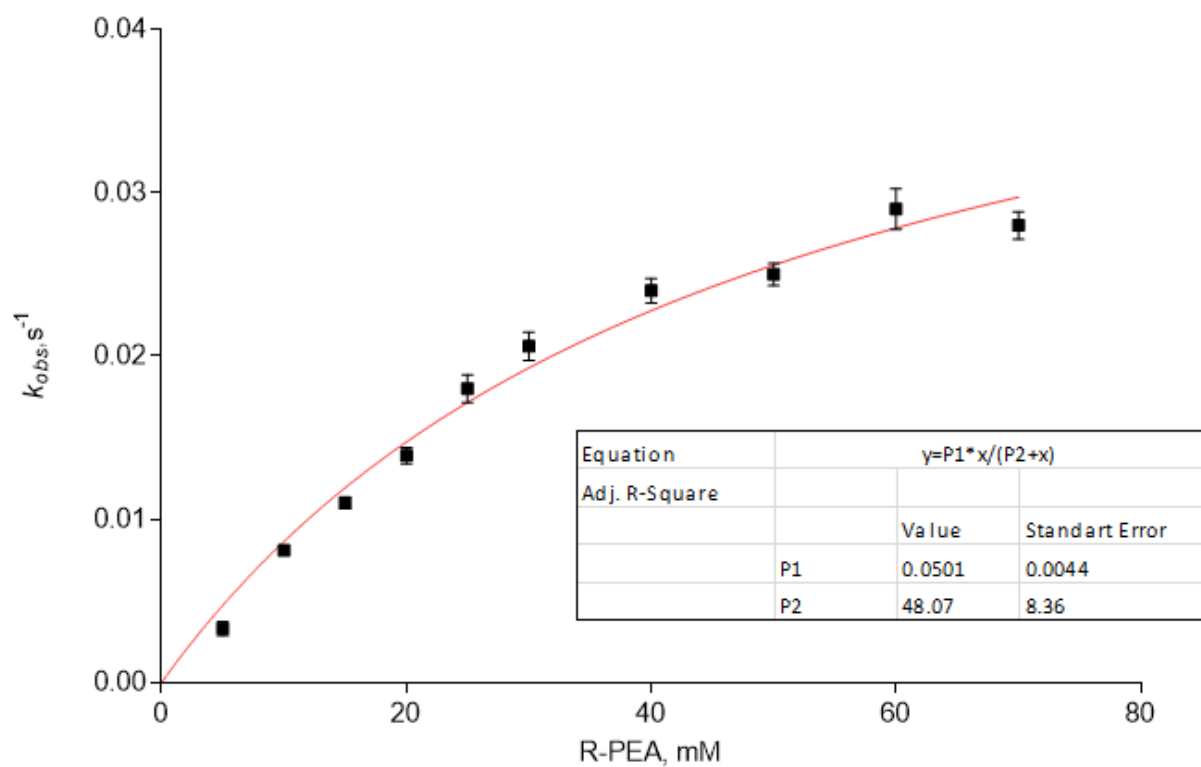

### For mP2O1

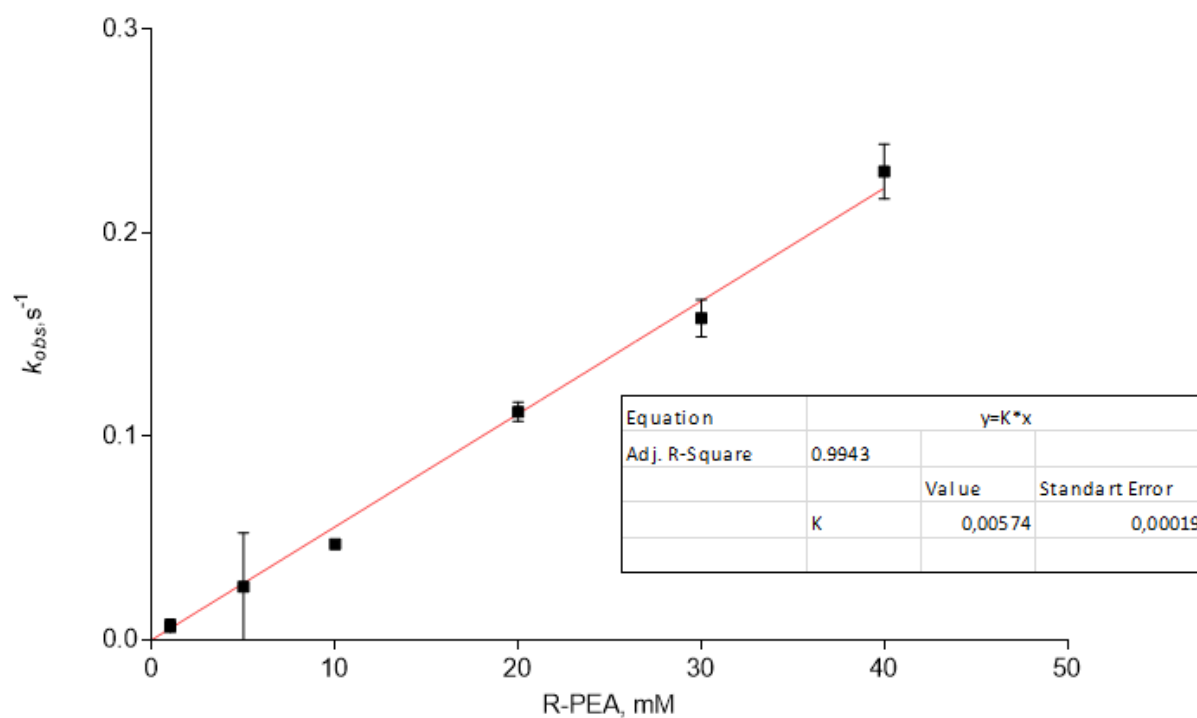

### For mP3O1

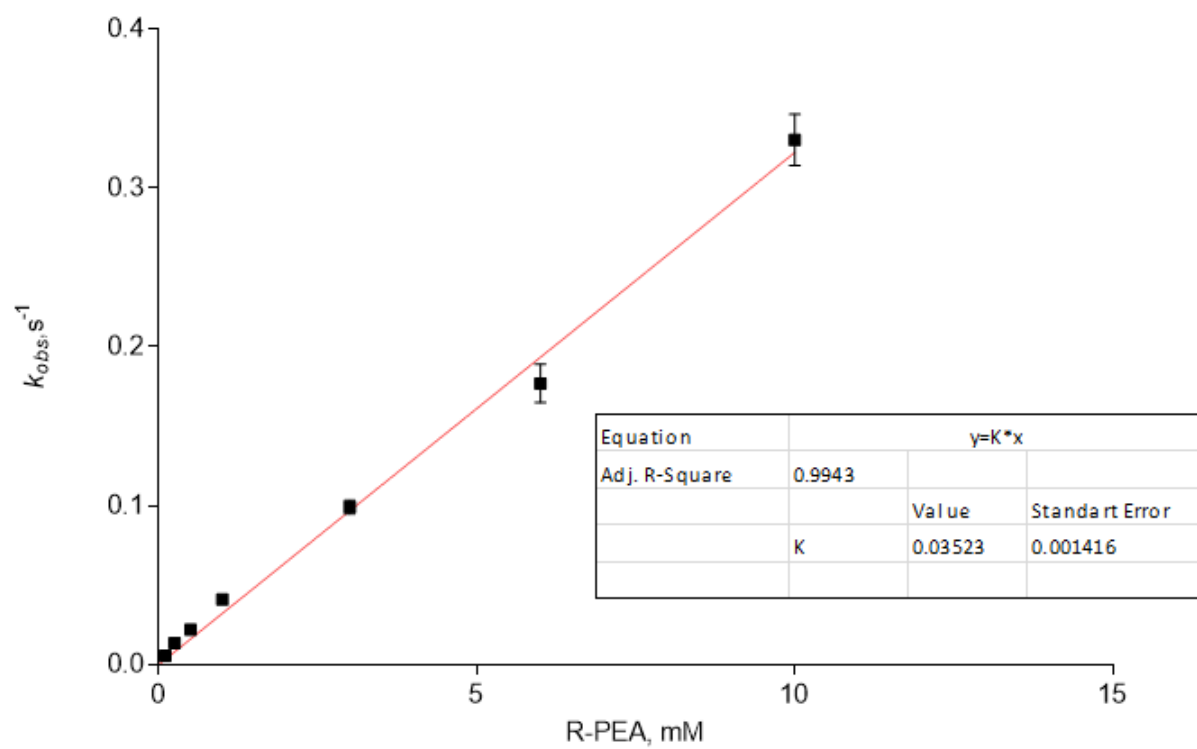

For mP3O3

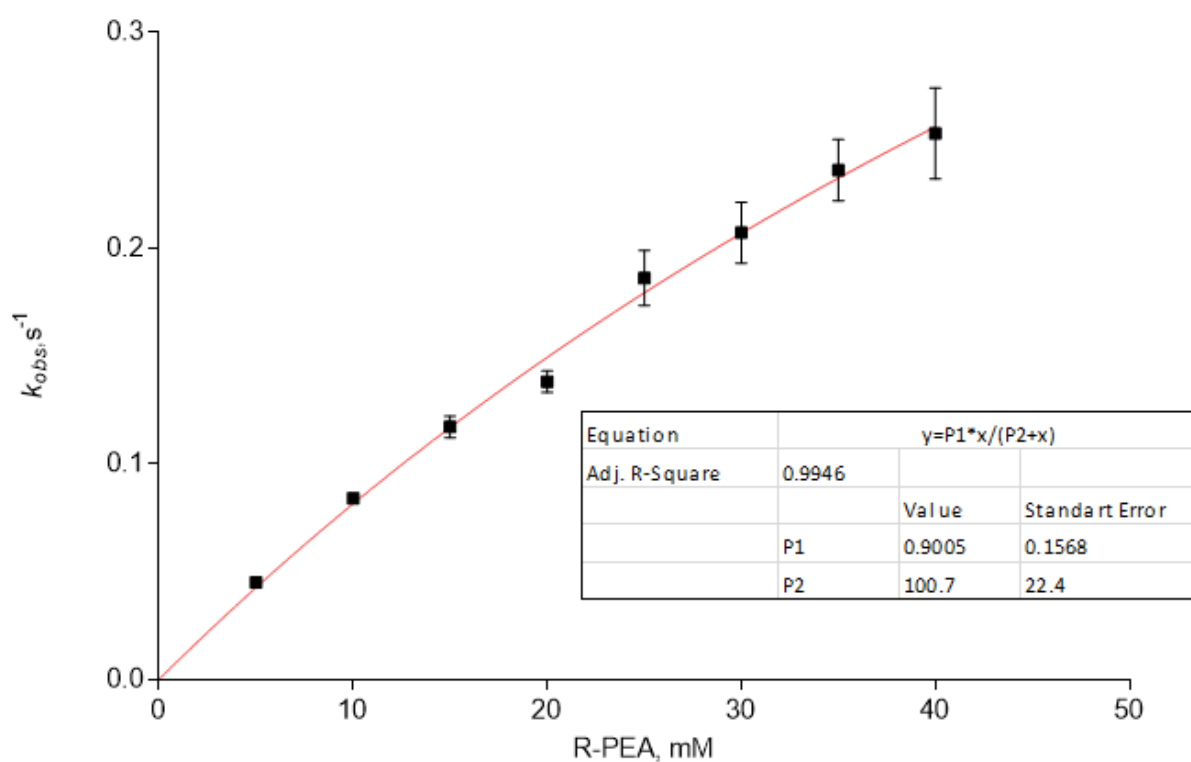

For mP3O5

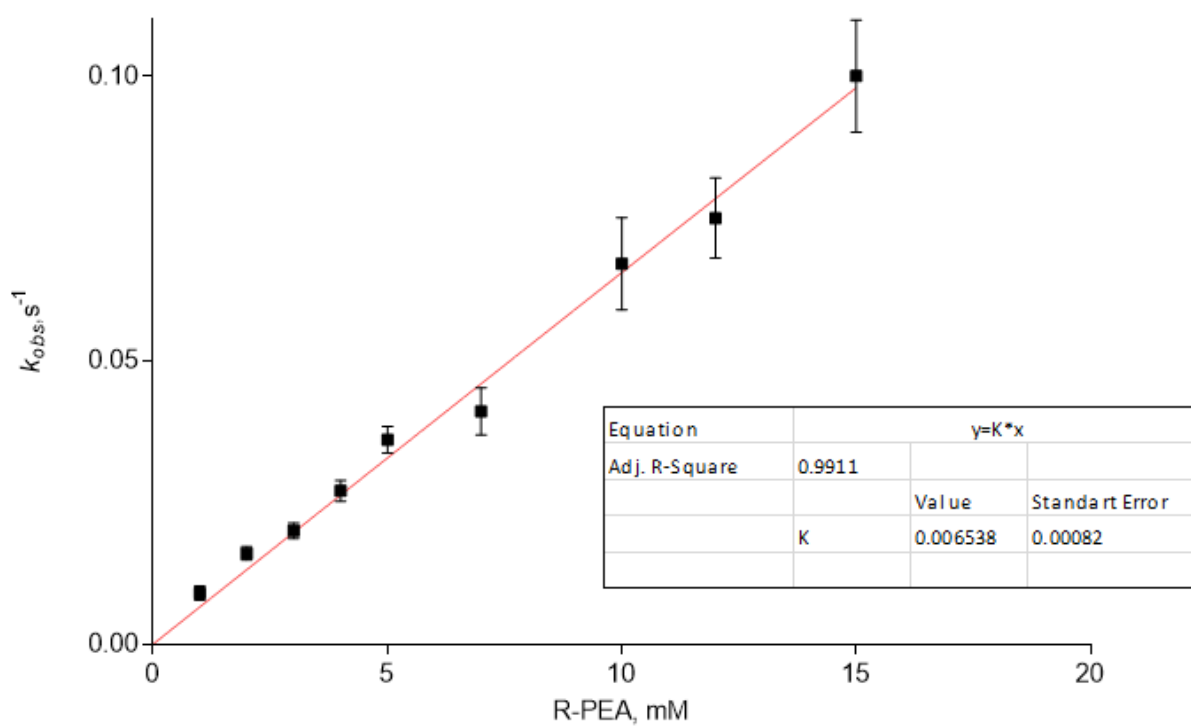



For mP3O7

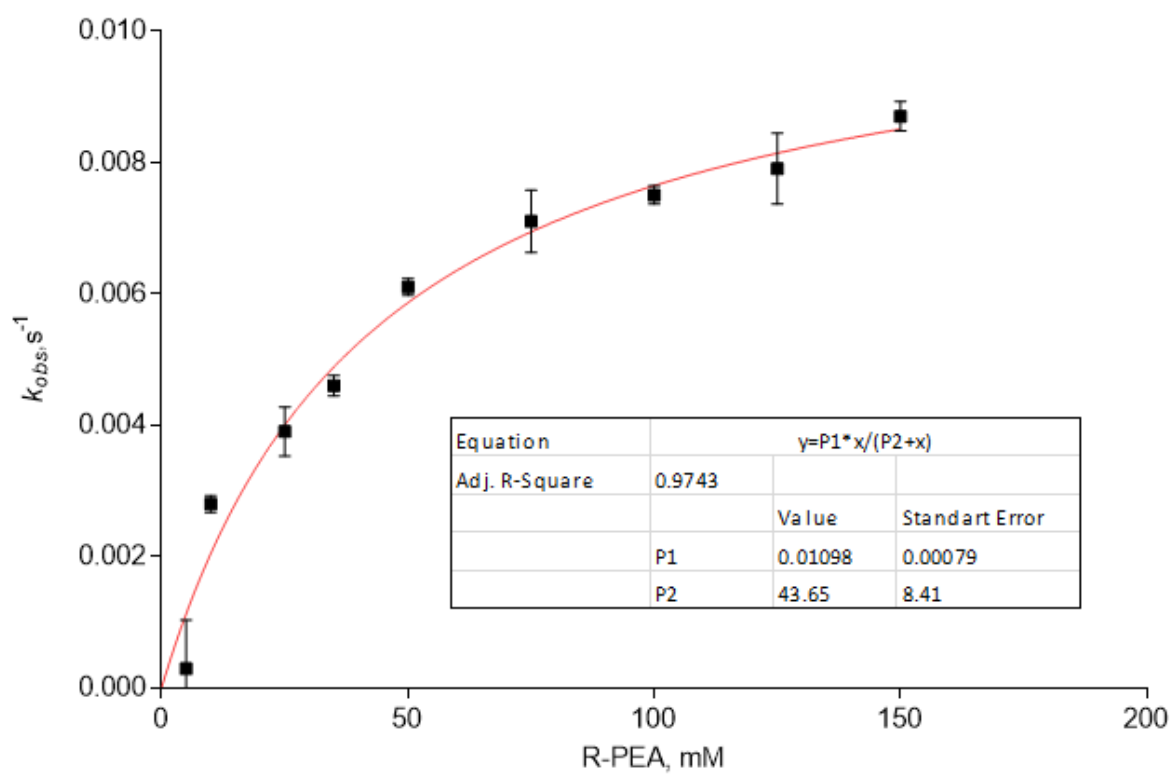

The dependence of the observed rate constant of half-reaction ( $k_{obs}$ ) on concentration of ((*R*)-(+)-1-phenylethylamine (R-PEA) in 50 mM Tris-HCl buffer, pH 7.0, at 40 °C. All data are collected in triplicate, and error bars correspond to the standard deviation of the mean (some are too small to be seen).

For **WT *TaTT***

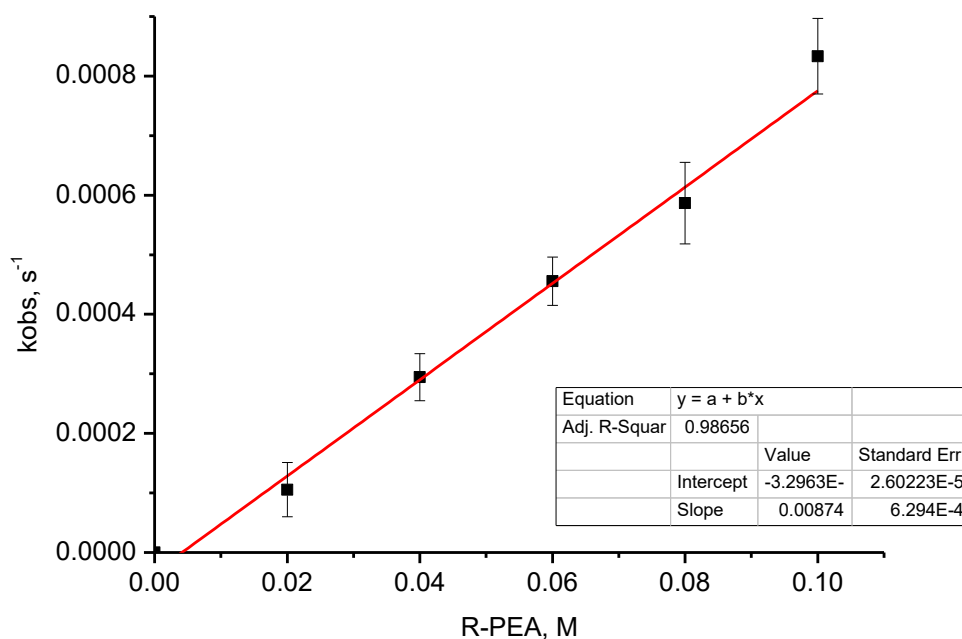

For **mP3O1** variant

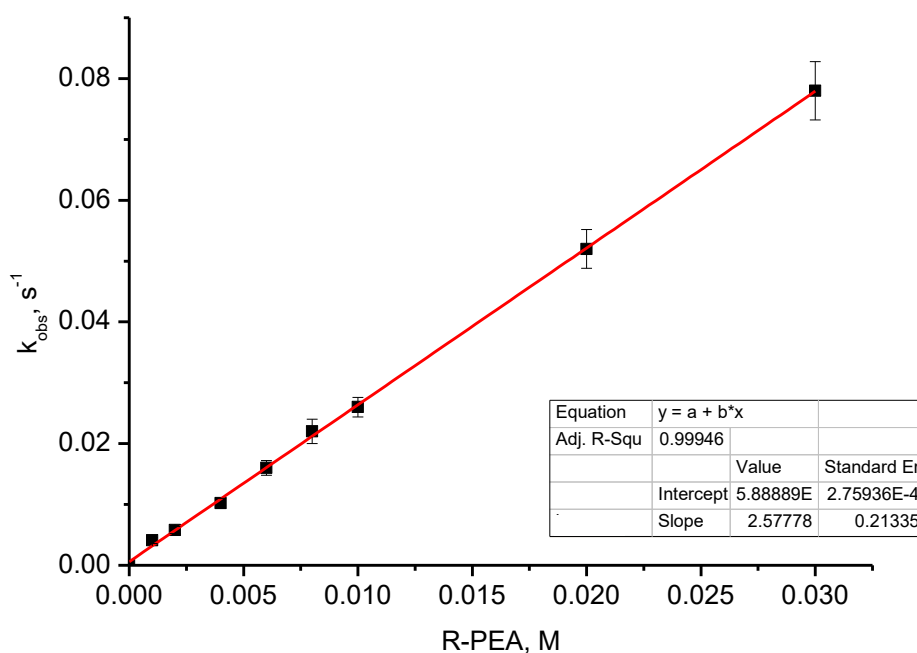

Supplement: pone.0255098.s013.pdf [file pone.0255098.s013.pdf]
