# Supplementary material for: Probing the role of the residues in the active site of the transaminase from Thermobaculum terrenum
Source: PubMed Central journal article supplement (PMC8320979; doi:10.1371/journal.pone.0255098), 2021-07-29

**Figure S1. Benchmark reactions catalyzed by members of PLP fold type IV superfamily. Unique reactions catalyzed by *TaTT*.**

Benchmark reaction of DAATs

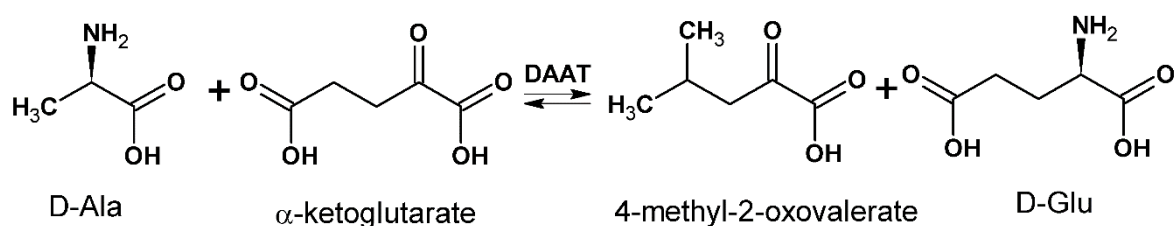

Benchmark reaction of BCATs

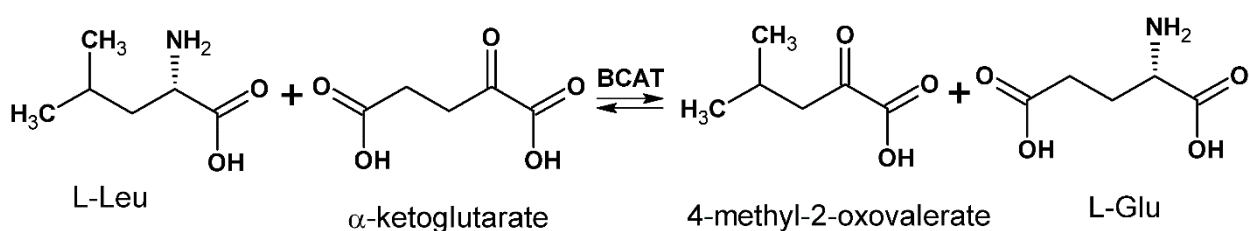

Benchmark reaction of R-TAs

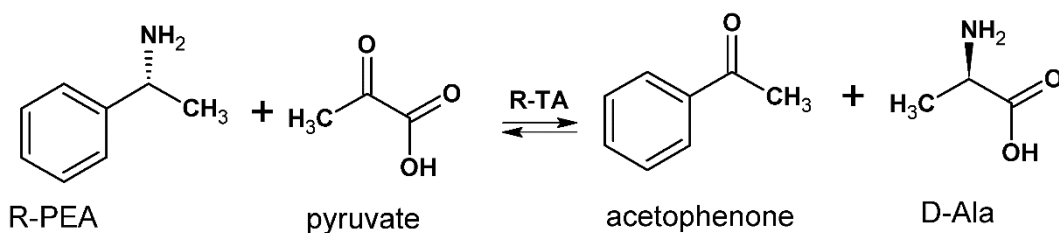

Unique reactions catalyzed by *TaTT*

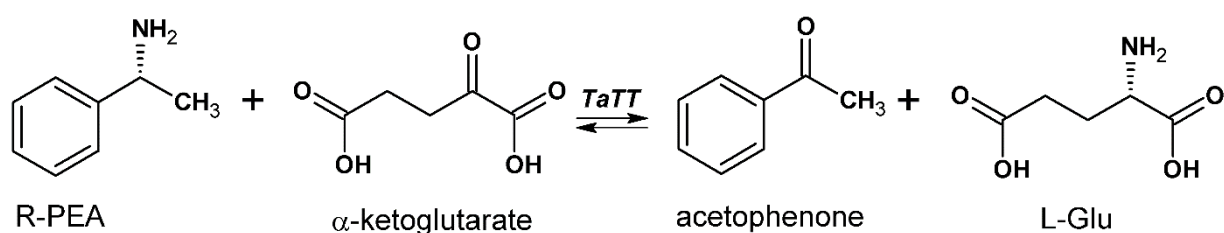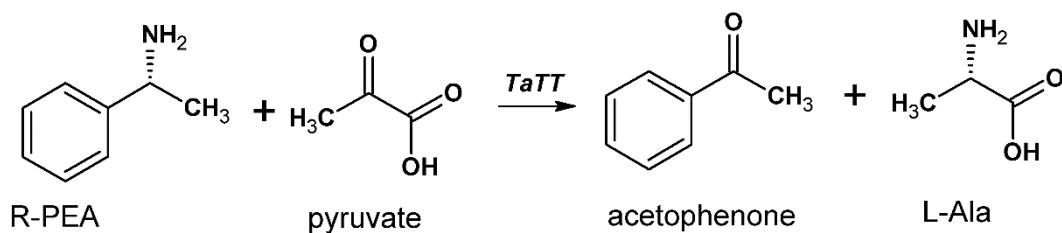

Supplement: pone.0255098.s001.pdf [file pone.0255098.s001.pdf]
