# Supplementary material for: Probing the role of the residues in the active site of the transaminase from Thermobaculum terrenum
Source: PubMed Central journal article supplement (PMC8320979; doi:10.1371/journal.pone.0255098), 2021-07-29

**Figure S2.** The active site of PLP-dependent TAs of fold type IV is exemplified by a canonical BCAT from *E. coli* (PDB ID 1I1L). One subunit of the dimer is gray. The other is colored: large and small domains are in yellow and green, respectively. One side and the bottom of both active site pockets are formed by the residues from the  $\beta$ X- and  $\beta$ Y-strands (cyan) of one subunit of the active dimer. The interdomain loop (orange) and  $\beta$ -turn (black) of the large domain of this subunit confine the P-pocket from the other sides. The O-pocket loop of the second subunit (red) of the dimer complements a side and the lid of the O-pocket together with two  $\alpha$ -helices from both subunits.

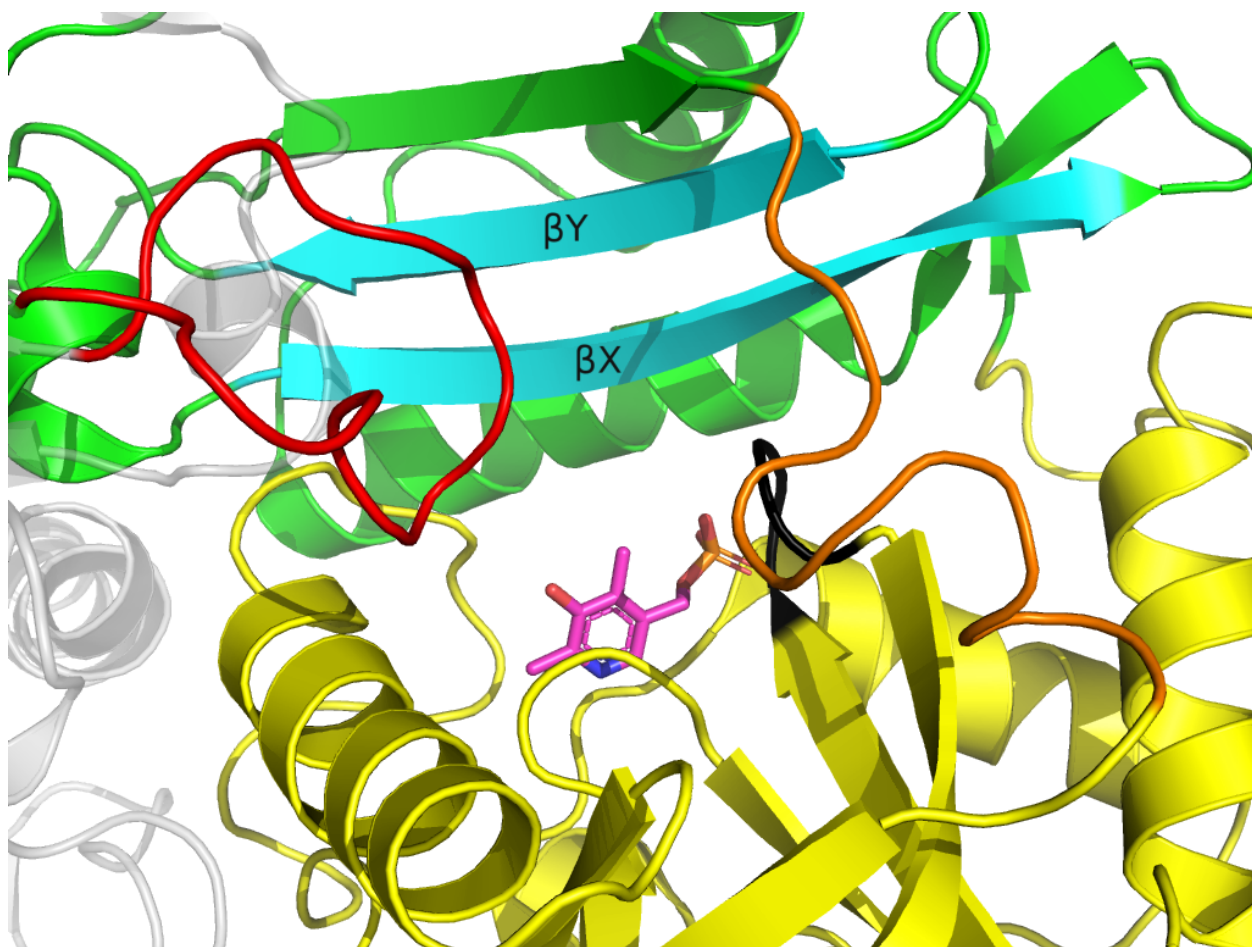

Supplement: pone.0255098.s002.pdf [file pone.0255098.s002.pdf]
