# Supplementary material for: Probing the role of the residues in the active site of the transaminase from Thermobaculum terrenum
Source: PubMed Central journal article supplement (PMC8320979; doi:10.1371/journal.pone.0255098), 2021-07-29

**Figure S3. Schematic representation of the active site of *TaTT*.** The inner surface of the active site is shown as a semitransparent surface. PLP molecule covalently bound to catalytic lysine is pink. Important residues of the P- and O-pockets are shown in blue and cyan sticks, respectively, and labeled. Protein fold is shown as a yellow cartoon for clarity.

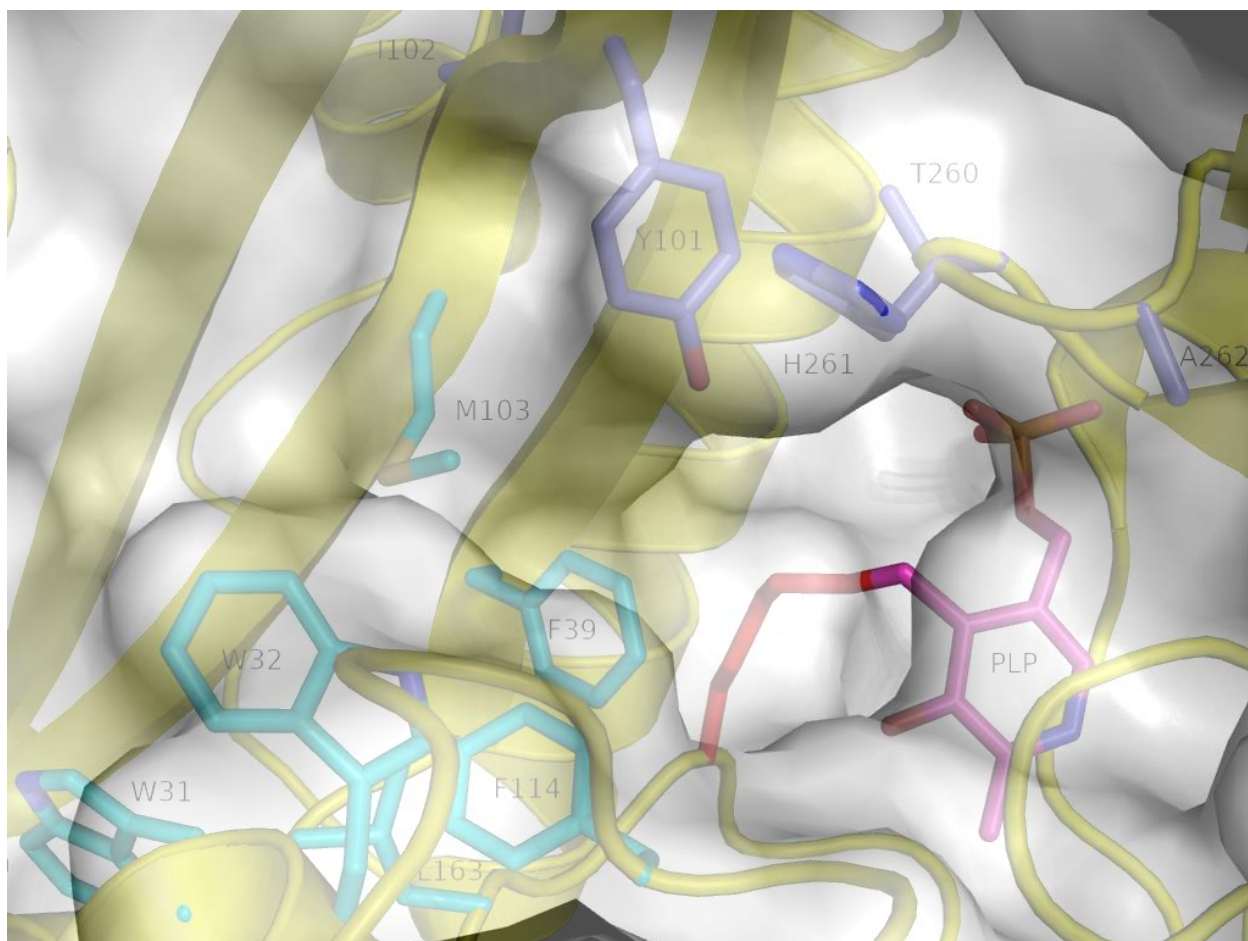

Supplement: pone.0255098.s003.pdf [file pone.0255098.s003.pdf]
