# Supplementary material for: Probing the role of the residues in the active site of the transaminase from Thermobaculum terrenum
Source: PubMed Central journal article supplement (PMC8320979; doi:10.1371/journal.pone.0255098), 2021-07-29
Supplement: pone.0255098.s006.pdf [file pone.0255098.s006.pdf]

**Table S1. List of primer sequences for the *TaTT* mutagenesis.**

| Mutation        | Primer           | Sequence (from 5' to 3' end)                                     |
|-----------------|------------------|------------------------------------------------------------------|
| R43S            | R43S.R           | GTTCCAGTAACC <b>AGAG</b> GATACCTTCGAAGACC<br>GC                  |
|                 | CheckR43S.F      | GCGGTCTTCGAAGGTAT <b>CTC</b>                                     |
| Y101F           | Y101F.F          | ACCGTGGCGATGTG <b>TTC</b> ATCATGCCGCTGGC                         |
|                 | CheckY101F.R     | AAGCCAGCGGCATGAT <b>GA</b>                                       |
| Y166W           | Y166W.F          | GCATTGGCCAAC <b>TGGG</b> CGTAATAGCCAGCTG                         |
|                 | CheckY166W.F     | AAGGCATTGGCCAAC <b>TGG</b>                                       |
| G41V +R43S      | G41V&R43S.F      | ACTGCGGTCTTCGAA <b>GTG</b> AT <b>CTCT</b> GGTTACT<br>GG          |
|                 | CheckG41V.F      | ACTGCGGTCTTCGAA <b>GTG</b>                                       |
| G41V +R43S+F39Y | F39Y&41V&43S.F   | ACTGCGGT <b>CTAC</b> GAA <b>GTG</b> AT <b>CTCT</b> GGTTACT<br>GG |
|                 | CheckF39Y&G41V.F | ACTGCGGT <b>CTAC</b> GAA <b>GTG</b>                              |
| S115R           | S115R.R          | TCACCAACAAC <b>ACG</b> GAATGCTTTGTTGCCCA                         |
|                 | Check S115R.R    | GCGGTCACCAACAAC <b>ACG</b>                                       |
| +A108           | 108+A.R          | GCTTTGTTGCCAC <b>GGC</b> TGCATAAGCCAGCG<br>GC                    |
|                 | Check108+A.F     | GCCGCTGGCTTATGC <b>AG</b>                                        |
| W32H            | W32H.F           | GACAGACTACTGG <b>CAT</b> GCGAGCGTTACTGC                          |
|                 | CheckW32H.F      | CTGACAGACTACTGG <b>CAT</b>                                       |
|                 | universal T7.F   | TAATACGACTCACTATAGGG                                             |
|                 | universal T7.R   | TAGTTATTGCTCAGCGGTGG                                             |

Nucleotide substitutions are shown in bold.
