# Supplementary material for: Probing the role of the residues in the active site of the transaminase from Thermobaculum terrenum
Source: PubMed Central journal article supplement (PMC8320979; doi:10.1371/journal.pone.0255098), 2021-07-29
Supplement: pone.0255098.s007.pdf [file pone.0255098.s007.pdf]

**Table S2. Subfamily-specific position among BCAT and R-TA families of PLP fold type IV.**

Subfamily-specific positions are ranked by decreasing statistical significance; higher rank means more significant input of the position on the functional difference between the families. For each position, its "Rank" is indicated (the higher the rank, the more is our interest in the position in terms of its potential influence on function) and specificity estimates (S-, Z-, P-estimates correspond to the initial value of the specificity function, its centered and normalized value and the assessment of statistical reliability, respectively). Positions are numbered according to PDB structure 6GKR. The amino acid content is provided separately for each family in each position.

| Rank | S-score | Z-score | P-value   | Position in <i>TaTT</i> structure (PDB ID 6GKR) | BCATs homologous to <i>TaTT</i> (308 sequences)                                                                                 | R-TAs homologous to <i>TaTT</i> (291 sequences)                                                                                |
|------|---------|---------|-----------|-------------------------------------------------|---------------------------------------------------------------------------------------------------------------------------------|--------------------------------------------------------------------------------------------------------------------------------|
| 1    | 0.834   | 6.255   | 4.94E-08  | A/GLY/41                                        | G (99.4%) S (0.3%) - (0.3%)                                                                                                     | V (78.7%) T (20.6%) G (0.3%) A (0.3%)                                                                                          |
| 2    | 0.993   | 6.075   | 1.19E-14  | A/TYR/166                                       | Y (100.0%)                                                                                                                      | W (99.3%) R (0.3%) - (0.3%)                                                                                                    |
| 3    | 0.967   | 5.914   | 1.18E-20  | A/ASN/168                                       | N (96.4%) Q (1.3%) T (1.0%) S (0.6%) L (0.3%) I (0.3%)                                                                          | D (99.7%) E (0.3%)                                                                                                             |
| 4    | 0.748   | 5.881   | 2.68E-27  | A/ALA/262                                       | A (65.9%) M (12.7%) V (11.4%) W (3.2%) Y (2.3%) T (1.9%) S (1.0%) G (0.3%) E (0.3%) F (0.3%) C (0.3%) Q (0.3%)                  | G (99.7%) - (0.3%)                                                                                                             |
| 5    | 0.93    | 5.861   | 4.88E-34  | A/PHE/39                                        | F (98.7%) Y (1.0%) - (0.3%)                                                                                                     | Y (97.6%) Q (2.4%)                                                                                                             |
| 6    | 0.798   | 5.838   | 1.06E-40  | A/GLY/259                                       | G (100.0%)                                                                                                                      | T (57.4%) S (41.9%) - (0.3%) A (0.3%)                                                                                          |
| 7    | 0.783   | 5.672   | 9.59E-45  | A/GLU/40                                        | E (85.4%) G (11.4%) A (2.6%) - (0.3%) D (0.3%)                                                                                  | D (93.8%) T (5.2%) E (1.0%)                                                                                                    |
| 8    | 0.718   | 5.604   | 4.83E-50  | A/GLU/263                                       | E (56.5%) Q (33.1%) H (7.5%) G (1.6%) A (0.6%) N (0.6%)                                                                         | G (99.7%) - (0.3%)                                                                                                             |
| 9    | 0.699   | 5.57    | 7.54E-56  | A/TRP/148                                       | W (93.5%) F (4.5%) Y (1.3%) I (0.6%)                                                                                            | V (68.7%) T (7.2%) Q (4.5%) P (4.1%) L (3.8%) R (2.4%) I (2.1%) Y (2.1%) E (1.4%) M (1.0%) H (1.0%) S (0.7%) - (0.7%) N (0.3%) |
| 10   | 0.817   | 5.519   | 4.43E-61  | A/TYR/45                                        | Y (91.2%) N (8.1%) F (0.4%) - (0.3%)                                                                                            | W (89.7%) R (2.7%) S (2.4%) F (1.7%) V (0.7%) H (0.7%) L (0.7%) K (0.3%) T (0.3%) C (0.3%) Y (0.3%)                            |
| 11   | 0.697   | 5.491   | 9.07E-67  | A/SER/34                                        | Y (86.0%) F (7.1%) W (2.9%) S (2.3%) T (0.6%) R (0.6%) - (0.3%)                                                                 | H (72.2%) R (26.1%) K (1.4%) W (0.3%)                                                                                          |
| 12   | 0.636   | 5.479   | 8.16E-73  | A/SER/169                                       | S (73.4%) G (7.5%) T (7.1%) A (5.8%) N (4.9%) M (0.3%) Y (0.3%) L (0.3%) P (0.3%)                                               | L (76.6%) F (14.1%) M (9.3%)                                                                                                   |
| 13   | 0.598   | 5.467   | 7.64E-79  | A/GLY/44                                        | A (49.4%) G (36.7%) C (10.4%) S (1.6%) V (1.3%) - (0.3%) T (0.3%)                                                               | V (92.8%) I (3.4%) A (2.1%) T (1.0%) F (0.3%) M (0.3%)                                                                         |
| 14   | 0.742   | 5.444   | 1.85E-84  | A/VAL/35                                        | G (94.8%) A (2.3%) V (2.3%) T (0.3%) - (0.3%)                                                                                   | S (92.4%) G (5.2%) A (2.4%)                                                                                                    |
| 15   | 0.578   | 5.363   | 6.45E-88  | A/SER/199                                       | E (57.1%) A (17.9%) M (13.0%) S (9.4%) C (1.0%) Y (1.0%) G (0.3%) Q (0.3%)                                                      | F (86.6%) Y (11.0%) A (1.4%) S (0.7%) C (0.3%)                                                                                 |
| 16   | 0.71    | 5.356   | 7.22E-94  | A/THR/36                                        | T (59.4%) L (15.9%) A (7.1%) S (5.8%) N (3.2%) I (1.9%) V (1.6%) F (1.3%) G (1.0%) C (1.0%) W (0.6%) Y (0.3%) - (0.3%) D (0.3%) | D (99.7%) N (0.3%)                                                                                                             |
| 17   | 0.574   | 5.345   | 1.20E-99  | A/ALA/164                                       | G (64.6%) A (30.5%) S (3.9%) P (1.0%)                                                                                           | H (50.9%) Q (47.8%) M (0.7%) - (0.3%) N (0.3%)                                                                                 |
| 18   | 0.709   | 5.295   | 9.84E-104 | A/MET/53                                        | L (62.3%) M (8.8%) I (6.2%) S (5.2%) V (5.2%) A (2.6%) P (2.6%) F (2.3%) T (2.3%) N (1.0%) R (1.0%) H (0.3%) Y (0.3%)           | G (98.3%) S (0.7%) N (0.3%) D (0.3%) R (0.3%)                                                                                  |

|    |       |       |           |           |                                                                                                                                                                   |                                                                                                                                              |
|----|-------|-------|-----------|-----------|-------------------------------------------------------------------------------------------------------------------------------------------------------------------|----------------------------------------------------------------------------------------------------------------------------------------------|
| 19 | 0.569 | 5.258 | 3.15E-108 | A/ARG/43  | R (91.6%) P (3.9%) K (3.2%)<br>G (0.3%) A (0.3%) C (0.3%) -<br>(0.3%)                                                                                             | H (36.1%) S (33.3%) A (14.1%) T<br>(6.9%) P (4.8%) G (3.8%) V (0.3%)<br>I (0.3%) N (0.3%)                                                    |
| 20 | 0.605 | 5.202 | 1.21E-111 | A/ALA/162 | A (25.6%) I (24.0%) V (22.1%)<br>C (9.1%) S (5.5%) L (4.5%) P<br>(3.9%) T (2.9%) M (1.6%) N<br>(0.6%)                                                             | N (97.3%) H (2.4%) - (0.3%)                                                                                                                  |
| 21 | 0.642 | 5.15  | 4.66E-115 | A/MET/103 | R (93.2%) C (2.6%) H (1.6%)<br>V (0.6%) M (0.6%) T (0.3%) Y<br>(0.3%) Q (0.3%) L (0.3%)                                                                           | E (59.8%) A (16.8%) Q (7.6%) N<br>(4.5%) S (3.1%) - (2.1%) W (2.1%)<br>C (1.0%) M (1.0%) D (0.7%) Y<br>(0.3%) V (0.3%) K (0.3%) L<br>(0.3%)  |
| 22 | 0.833 | 5.121 | 1.81E-119 | A/PRO/157 | P (89.0%) S (5.2%) M (3.6%)<br>V (1.0%) F (0.6%) I (0.3%) A<br>(0.3%)                                                                                             | D (93.1%) N (3.8%) E (1.0%) S<br>(1.0%) - (0.7%) Y (0.3%)                                                                                    |
| 23 | 0.676 | 5.07  | 1.25E-122 | A/TYR/107 | Y (68.5%) F (28.9%) W (1.0%)<br>C (0.3%) S (0.3%) I (0.3%) L<br>(0.3%) G (0.3%)                                                                                   | T (82.1%) L (6.9%) S (5.8%) A<br>(3.4%) - (1.0%) M (0.3%) V (0.3%)                                                                           |
| 24 | 0.673 | 4.985 | 9.56E-124 | A/TYR/30  | H (56.2%) N (11.0%) P<br>(10.1%) K (8.1%) Q (4.5%) A<br>(2.6%) V (2.3%) R (1.3%) T<br>(1.0%) G (0.6%) L (0.6%) I<br>(0.3%) - (0.3%) S (0.3%) Y<br>(0.3%) E (0.3%) | D (97.9%) - (1.0%) E (0.7%) H<br>(0.3%)                                                                                                      |
| 25 | 0.586 | 4.874 | 4.25E-123 | A/TRP/31  | A (61.4%) T (12.7%) G<br>(11.4%) S (9.1%) V (2.9%) F<br>(1.3%) M (0.3%) W (0.3%) C<br>(0.3%) - (0.3%)                                                             | F (83.5%) L (8.2%) Y (6.9%) V<br>(1.0%) - (0.3%)                                                                                             |
| 26 | 0.485 | 4.753 | 1.33E-121 | A/PRO/104 | P (83.1%) Q (6.5%) V (2.9%) L<br>(1.9%) I (1.6%) M (1.6%) A<br>(1.3%) T (1.0%)                                                                                    | M (45.0%) L (33.0%) I (13.4%) V<br>(3.4%) F (2.4%) W (2.1%) - (0.7%)                                                                         |
| 27 | 0.395 | 4.717 | 1.30E-124 | A/ILE/42  | I (76.6%) L (10.7%) V (5.8%)<br>M (2.9%) T (2.3%) F (1.0%) -<br>(0.3%) E (0.3%)                                                                                   | V (45.4%) P (36.8%) A (10.7%) I<br>(3.8%) T (1.7%) - (1.4%) F (0.3%)                                                                         |
| 28 | 0.653 | 4.663 | 1.96E-126 | A/GLY/297 | G (89.0%) N (3.6%) A (3.2%)<br>S (1.9%) C (1.6%) D (0.3%) R<br>(0.3%)                                                                                             | H (71.5%) R (9.3%) E (6.2%) D<br>(2.7%) L (2.1%) A (2.1%) Y<br>(1.7%) M (1.4%) S (0.7%) N<br>(0.7%) Q (0.7%) I (0.7%) K (0.3%)               |
| 29 | 0.43  | 4.662 | 2.98E-131 | A/LEU/171 | L (76.9%) F (10.1%) M (6.5%)<br>V (2.6%) I (2.6%) Y (1.0%) A<br>(0.3%)                                                                                            | R (53.3%) K (10.3%) A (10.0%) M<br>(8.6%) Q (4.5%) S (3.4%) L (3.4%)<br>T (2.7%) D (0.7%) I (0.7%) C<br>(0.7%) N (0.7%) G (0.7%) E<br>(0.3%) |
| 30 | 0.445 | 4.594 | 5.76E-132 | A/ILE/55  | I (31.8%) V (30.8%) L (15.3%)<br>A (14.6%) G (4.2%) M (1.0%)<br>T (0.6%) C (0.6%) F (0.3%) S<br>(0.3%) Y (0.3%)                                                   | F (88.0%) I (5.8%) L (3.1%) Y<br>(1.7%) V (0.7%) T (0.3%) A<br>(0.3%)                                                                        |
| 31 | 0.453 | 4.505 | 4.93E-131 | A/ILE/102 | I (64.6%) V (16.9%) L (12.3%)<br>M (4.5%) F (1.0%) Y (0.3%) A<br>(0.3%)                                                                                           | V (95.9%) C (1.7%) I (1.0%) -<br>(0.7%) L (0.3%) A (0.3%)                                                                                    |
| 32 | 0.549 | 4.407 | 2.26E-129 | A/ALA/108 | K (44.5%) V (14.6%) F (8.4%)<br>L (6.5%) R (5.2%) I (4.9%) Y<br>(3.9%) T (3.6%) N (2.9%) A<br>(2.6%) P (1.9%) D (0.3%) S<br>(0.3%) G (0.3%)                       | R (99.0%) - (1.0%)                                                                                                                           |
| 33 | 0.477 | 4.399 | 2.93E-133 | A/VAL/38  | V (62.0%) C (21.4%) I (9.1%)<br>A (3.9%) L (1.9%) F (0.6%) T<br>(0.3%) - (0.3%) Y (0.3%)                                                                          | T (86.6%) V (5.5%) A (4.1%) C<br>(3.4%) F (0.3%)                                                                                             |
| 34 | 0.433 | 4.285 | 4.67E-130 | A/VAL/100 | V (39.6%) T (16.6%) C<br>(13.3%) I (13.0%) L (7.1%) A<br>(5.5%) F (1.3%) M (1.0%) S<br>(1.0%) G (1.0%) D (0.6%)                                                   | A (86.6%) S (10.3%) V (1.7%) G<br>(1.0%) - (0.3%)                                                                                            |
| 35 | 0.574 | 4.228 | 1.96E-130 | A/ARG/292 | F (52.9%) A (7.1%) L (6.8%) D<br>(6.5%) S (4.9%) E (4.2%) R<br>(3.6%) H (2.9%) M (2.9%) Q<br>(2.6%) Y (2.3%) I (1.0%) N<br>(1.0%) T (0.6%) K (0.3%) V<br>(0.3%)   | W (95.5%) F (3.8%) Y (0.7%)                                                                                                                  |

|    |       |       |           |           |                                                                                                                        |                                                                                                                |
|----|-------|-------|-----------|-----------|------------------------------------------------------------------------------------------------------------------------|----------------------------------------------------------------------------------------------------------------|
| 36 | 0.355 | 4.162 | 4.26E-130 | A/LEU/163 | T (36.0%) G (18.5%) S (13.3%)<br>A (12.7%) C (7.5%) N (4.9%)<br>V (2.6%) F (1.9%) I (1.3%) L<br>(0.6%) Q (0.6%)        | Y (44.7%) L (39.9%) F (14.8%) -<br>(0.3%) C (0.3%)                                                             |
| 37 | 0.402 | 4.139 | 1.69E-132 | A/SER/147 | S (88.0%) T (6.5%) N (2.6%) A<br>(1.6%) R (0.6%) K (0.6%)                                                              | R (46.7%) D (19.6%) S (10.0%) E<br>(8.2%) K (5.8%) Q (2.7%) N<br>(2.4%) G (1.7%) A (1.4%) P (1.0%)<br>T (0.3%) |
| 38 | 0.338 | 4.128 | 1.04E-135 | A/GLN/170 | A (50.6%) R (19.2%) I (7.5%)<br>S (6.2%) V (5.8%) Q (4.2%) C<br>(2.3%) G (2.3%) H (0.6%) L<br>(0.6%) T (0.3%) M (0.3%) | T (49.1%) V (37.8%) I (6.9%) E<br>(2.4%) K (2.1%) N (1.7%)                                                     |
