# Supplementary material for: Probing the role of the residues in the active site of the transaminase from Thermobaculum terrenum
Source: PubMed Central journal article supplement (PMC8320979; doi:10.1371/journal.pone.0255098), 2021-07-29
Supplement: pone.0255098.s008.pdf [file pone.0255098.s008.pdf]

**Table S3. Superposition of the *TaTT* subunit with the closest homologs.**

| <b>Protein (PDB code)</b>                                                                | <b>Aligned residues, %</b> | <b>RMSD, Å</b> | <b>Sequence identity, %</b> |
|------------------------------------------------------------------------------------------|----------------------------|----------------|-----------------------------|
| 1 Amino acid aminotransferase from <i>Burkholderia pseudomallei</i> (4WHX)               | 96                         | 1.46           | 37                          |
| 2 Branched-chain amino acid aminotransferase from <i>Thermus thermophiles</i> (2EJ3)     | 96                         | 1.39           | 40                          |
| 3 Branched-chain amino acid aminotransferase from <i>Thermoproteus uzoniensis</i> (5CE8) | 95                         | 1.33           | 43                          |
| 4 Branched-chain amino acid aminotransferase from <i>E. coli</i> (1I1K)                  | 94                         | 1.33           | 37                          |
| 5 Branched-chain amino acid aminotransferase from <i>Geoglobus acetivorans</i> (5E25)    | 98                         | 1.43           | 31                          |
| 6 ( <i>R</i> )-selective amine transferase from <i>Aspergillus fumigatus</i> (4CHI)      | 98                         | 1.64           | 24                          |
| 7 D-amino acid aminotransferase from <i>Bacillus</i> sp. YM-1 (1DAA)                     | 93                         | 1.69           | 30                          |
| 8 ( <i>R</i> )-amine transaminase from <i>Arthrobacter</i> SP. KNK168 (3WWH)             | 82                         | 1.65           | 26                          |
