# Supplementary material for: Probing the role of the residues in the active site of the transaminase from Thermobaculum terrenum
Source: PubMed Central journal article supplement (PMC8320979; doi:10.1371/journal.pone.0255098), 2021-07-29
Supplement: pone.0255098.s009.pdf [file pone.0255098.s009.pdf]

**Table S4. RMSD (Å) between C $\alpha$  atoms of subunits of WT *TaTT* and its variants.**

| <i>TaTT</i>         | WT    | mP3   | mP3O3 |
|---------------------|-------|-------|-------|
| WT (PDB ID 6GKR)    | -     | 0.267 | 0.286 |
| mP3 (PDB ID 7NEA)   | 0.267 | -     | 0.190 |
| mP3O3 (PDB ID 7NEB) | 0.286 | 0.190 | -     |
