# Supplementary material for: Probing the role of the residues in the active site of the transaminase from Thermobaculum terrenum
Source: PubMed Central journal article supplement (PMC8320979; doi:10.1371/journal.pone.0255098), 2021-07-29
Supplement: pone.0255098.s010.pdf [file pone.0255098.s010.pdf]

**Table S5. Specificity determining sequence motifs of *TaTT* and TAs from the families of PLP fold type IV.**

|             | <b>Sequence motif 1</b>                         | <b>Sequence motif 2</b>                                                                        | <b>numbering corresponds to:</b>        |
|-------------|-------------------------------------------------|------------------------------------------------------------------------------------------------|-----------------------------------------|
| BCAT        | <sup>31</sup> YxxxxF[ED]Gx[KR] <sup>40</sup>    | <sup>95</sup> YxR <sup>97</sup> ... <sup>107</sup> [LMVI]G[VL] <sup>109</sup>                  | BCAT from <i>Escherichia coli</i>       |
| DAAT        | <sup>26</sup> FxxxxYxV[IVA][KR] <sup>35</sup>   | <sup>86</sup> HxY <sup>88</sup> ... <sup>98</sup> [RK]xH <sup>100</sup>                        | DAAT from <i>Bacillus sp.</i> YM-1      |
| R-TA        | <sup>53</sup> HxxxxYD[VT]x[STAHP] <sup>62</sup> | <sup>113</sup> [FY]V[EQAWNS] <sup>115</sup> ... <sup>126</sup> [RKFGP]x[STANER] <sup>128</sup> | R-TA from <i>Nectria haematococca</i>   |
| <i>TaTT</i> | <sup>34</sup> SxxxxFEGIR <sup>43</sup>          | <sup>101</sup> YIM <sup>103</sup> ..... <sup>114</sup> FSV <sup>116</sup>                      | BCAT from <i>Thermobaculum terrenum</i> |
